# Supplementary material
Source: PubMed Central journal article supplement (PMC2864005)
Supplement: NIHMS197261-supplement-01.pdf [file NIHMS197261-supplement-01.pdf]

# Supporting Information

## THE EFFECTS OF TYPE II BINDING ON METABOLIC STABILITY AND BINDING AFFINITY IN CYTOCHROME P450 CYP3A4

Chi-Chi Peng<sup>†</sup>, Josh T. Pearson<sup>‡</sup>, Dan A. Rock<sup>‡</sup>, Carolyn A. Joswig-Jones<sup>†</sup>, and Jeffrey P. Jones<sup>†</sup>

<sup>†</sup>*Department of Chemistry, Washington State University, P.O. Box 644630, Pullman, Washington 99164-4630; and*

<sup>‡</sup>*Department of Pharmacokinetics and Drug Metabolism, Amgen Inc., 1201 Amgen Court West, Seattle, Washington 98119*

|               |                                                               |
|---------------|---------------------------------------------------------------|
| Page S1-      | Title and list of contents                                    |
| Page S2-      | Table S1. DFT Energies for Different Basis Sets Page          |
| Page S2-S7-   | Basis Set for All Calculations with Effective Core potentials |
| Page S7-      | OPBE Water Coordinates Energy                                 |
| Page S7-      | OPBE Pyridine Energy                                          |
| Page S7-S8-   | OPBE Doublet Heme-Pyridine Ligand Energy                      |
| Page S8-S9    | OPBE Heme-Water complex Energy                                |
| Page S9-      | OPBE Heme No Ligand Doublet Energy                            |
| Page S9-S10   | OPBE Heme Sextet No Ligand Energy                             |
| Page S10-     | B3LYP Water Energy                                            |
| Page S10-     | B3LYP Pyridine Energy                                         |
| Page S11-     | B3LYP Heme-Pyridine Energy                                    |
| Page S11-S12- | B3LYP Heme-Water Energy                                       |
| Page S12-S13- | B3LYP Heme No Ligand Doublet Energy                           |
| Page S13-S14  | B3LYP Heme No Ligand Sextet Energy                            |
| Page S14-     | B3LYP Heme-Pyridine Energy                                    |
| Page S15-     | TPSS Triplet Molecular Oxygen Energy -150.3707088940          |
| Page S15-     | TPSS Water Energy                                             |
| Page S15-     | TPSS Pyridine Energy                                          |
| Page S15-S16- | TPSS Heme Doublet No Ligand Energy                            |
| Page S16-     | TPSS Heme Sextet No Ligand Energy                             |
| Page S16-S17- | TPSS Heme-Water Energy                                        |
| Page S17-S18  | TPSS Heme FE+2-Pyridine Energy                                |
| Page S18-S19  | TPSS Heme Pyridine Ligand Fe3+ Energy                         |

**Table S1. DFT Energies for Different Basis Sets**

| <b>No Ligand</b>                     | <b>OPBE</b>     | <b>B3LYP</b>      | <b>TPSS</b>       |
|--------------------------------------|-----------------|-------------------|-------------------|
| Sextet                               | -1510.578919    | -1510.73344361    | -1510.91694       |
| Doublet                              | -1510.56713522  | -1510.72283315    | -1510.92401887    |
| delta                                | -7.394321950055 | -6.65806364997025 | 4.44199092499161  |
| <b>Ligand/Heme</b>                   |                 |                   |                   |
| pyridine reduced Heme                | ND              | ND                | -1759.4275243     |
| pyridine                             | -1758.78101922  | -1759.04162094    | -1759.2999094     |
| water                                | -1586.973379    | -1587.17171669    | -1587.3789680     |
| oxygen                               | ND              |                   |                   |
|                                      |                 |                   |                   |
| <b>Ligand only</b>                   |                 |                   |                   |
| pyridine                             | -248.211402938  | -248.3042282930   | -248.353987       |
| water                                | -76.4048721     | -76.4169106417    | -76.4415112070    |
| oxygen                               | ND              | ND                | -150.370708894    |
|                                      |                 |                   |                   |
| <b>Binding Energy versus doublet</b> |                 |                   |                   |
| heme-pyridine                        | -1.556866405001 | -9.13608436746017 | -13.7444650749484 |
| heme-water                           | -0.860729200092 | -20.0629936832217 | -8.43229668240951 |

**Basis Set for All Calculations with Effective Core potentials-**

```

H 0
S 3 1.00
  13.01000000  0.01968500
  1.96200000  0.13797700
  0.44460000  0.47814800
S 1 1.00
  0.12200000  1.00000000
P 1 1.00
  0.72700000  1.00000000
****
S 0
S 11 1.00
110800.00000000  0.00024800
16610.00000000  0.00192000
3781.00000000  0.00996200
1071.00000000  0.04029700
349.80000000  0.12860400
126.30000000  0.30348000
49.26000000  0.42143200
20.16000000  0.23078100
5.72000000  0.01789700
2.18200000 -0.00297500
0.43270000  0.00085000
S 11 1.00
110800.00000000 -0.00006900
16610.00000000 -0.00052800

```

|                 |             |
|-----------------|-------------|
| 3781.00000000   | -0.00279700 |
| 1071.00000000   | -0.01126500 |
| 349.80000000    | -0.03888300 |
| 126.30000000    | -0.09950200 |
| 49.26000000     | -0.19974000 |
| 20.16000000     | -0.12336000 |
| 5.72000000      | 0.51319400  |
| 2.18200000      | 0.60712000  |
| 0.43270000      | 0.03967500  |
| S 11 1.00       |             |
| 110800.00000000 | 0.00002000  |
| 16610.00000000  | 0.00015300  |
| 3781.00000000   | 0.00081000  |
| 1071.00000000   | 0.00329000  |
| 349.80000000    | 0.01129700  |
| 126.30000000    | 0.02963900  |
| 49.26000000     | 0.05998500  |
| 20.16000000     | 0.04132500  |
| 5.72000000      | -0.20747400 |
| 2.18200000      | -0.39288900 |
| 0.43270000      | 0.63284000  |
| S 1 1.00        |             |
| 0.15700000      | 1.00000000  |
| P 7 1.00        |             |
| 399.70000000    | 0.00447500  |
| 94.19000000     | 0.03417100  |
| 29.75000000     | 0.14425000  |
| 10.77000000     | 0.35392800  |
| 4.11900000      | 0.45908500  |
| 1.62500000      | 0.20638300  |
| 0.47260000      | 0.01021400  |
| P 7 1.00        |             |
| 399.70000000    | -0.00116300 |
| 94.19000000     | -0.00865700 |
| 29.75000000     | -0.03908900 |
| 10.77000000     | -0.09346300 |
| 4.11900000      | -0.14799400 |
| 1.62500000      | 0.03019000  |
| 0.47260000      | 0.56157300  |
| P 1 1.00        |             |
| 0.14070000      | 1.00000000  |
| D 1 1.00        |             |
| 0.47900000      | 1.00000000  |
| S 1 1.00        |             |
| 0.05070000      | 1.00000000  |
| P 1 1.00        |             |
| 0.03990000      | 1.00000000  |
| ****            |             |
| O 0             |             |
| S 8 1.00        |             |
| 11720.00000000  | 0.00071000  |
| 1759.00000000   | 0.00547000  |
| 400.80000000    | 0.02783700  |
| 113.70000000    | 0.10480000  |
| 37.03000000     | 0.28306200  |
| 13.27000000     | 0.44871900  |
| 5.02500000      | 0.27095200  |
| 1.01300000      | 0.01545800  |
| S 8 1.00        |             |

|                |             |
|----------------|-------------|
| 11720.00000000 | -0.00016000 |
| 1759.00000000  | -0.00126300 |
| 400.80000000   | -0.00626700 |
| 113.70000000   | -0.02571600 |
| 37.03000000    | -0.07092400 |
| 13.27000000    | -0.16541100 |
| 5.02500000     | -0.11695500 |
| 1.01300000     | 0.55736800  |
| S 1 1.00       |             |
| 0.30230000     | 1.00000000  |
| P 3 1.00       |             |
| 17.70000000    | 0.04301800  |
| 3.85400000     | 0.22891300  |
| 1.04600000     | 0.50872800  |
| P 1 1.00       |             |
| 0.27530000     | 1.00000000  |
| D 1 1.00       |             |
| 1.18500000     | 1.00000000  |
| S 1 1.00       |             |
| 0.07896000     | 1.00000000  |
| P 1 1.00       |             |
| 0.06856000     | 1.00000000  |
| ****           |             |
| C 0            |             |
| S 8 1.00       |             |
| 6665.00000000  | 0.00069200  |
| 1000.00000000  | 0.00532900  |
| 228.00000000   | 0.02707700  |
| 64.71000000    | 0.10171800  |
| 21.06000000    | 0.27474000  |
| 7.49500000     | 0.44856400  |
| 2.79700000     | 0.28507400  |
| 0.52150000     | 0.01520400  |
| S 8 1.00       |             |
| 6665.00000000  | -0.00014600 |
| 1000.00000000  | -0.00115400 |
| 228.00000000   | -0.00572500 |
| 64.71000000    | -0.02331200 |
| 21.06000000    | -0.06395500 |
| 7.49500000     | -0.14998100 |
| 2.79700000     | -0.12726200 |
| 0.52150000     | 0.54452900  |
| S 1 1.00       |             |
| 0.15960000     | 1.00000000  |
| P 3 1.00       |             |
| 9.43900000     | 0.03810900  |
| 2.00200000     | 0.20948000  |
| 0.54560000     | 0.50855700  |
| P 1 1.00       |             |
| 0.15170000     | 1.00000000  |
| D 1 1.00       |             |
| 0.55000000     | 1.00000000  |
| ****           |             |
| N 0            |             |
| S 8 1.00       |             |
| 9046.00000000  | 0.00070000  |
| 1357.00000000  | 0.00538900  |
| 309.30000000   | 0.02740600  |
| 87.73000000    | 0.10320700  |

|               |             |
|---------------|-------------|
| 28.56000000   | 0.27872300  |
| 10.21000000   | 0.44854000  |
| 3.83800000    | 0.27823800  |
| 0.74660000    | 0.01544000  |
| S 8 1.00      |             |
| 9046.00000000 | -0.00015300 |
| 1357.00000000 | -0.00120800 |
| 309.30000000  | -0.00599200 |
| 87.73000000   | -0.02454400 |
| 28.56000000   | -0.06745900 |
| 10.21000000   | -0.15807800 |
| 3.83800000    | -0.12183100 |
| 0.74660000    | 0.54900300  |
| S 1 1.00      |             |
| 0.22480000    | 1.00000000  |
| P 3 1.00      |             |
| 13.55000000   | 0.03991900  |
| 2.91700000    | 0.21716900  |
| 0.79730000    | 0.51031900  |
| P 1 1.00      |             |
| 0.21850000    | 1.00000000  |
| D 1 1.00      |             |
| 0.81700000    | 1.00000000  |
| S 1 1.00      |             |
| 0.06124000    | 1.00000000  |
| P 1 1.00      |             |
| 0.05611000    | 1.00000000  |
| ****          |             |
| FE 0          |             |
| S 7 1.00      |             |
| 2473.84000000 | 0.00013600  |
| 359.74200000  | 0.00087200  |
| 24.48800000   | 0.05282000  |
| 8.38751000    | -0.39713800 |
| 1.72801000    | 0.74367300  |
| 0.72177500    | 0.45615900  |
| 0.11761200    | 0.01647500  |
| S 7 1.00      |             |
| 2473.84000000 | -0.00003100 |
| 359.74200000  | -0.00023700 |
| 24.48800000   | -0.01229200 |
| 8.38751000    | 0.10023900  |
| 1.72801000    | -0.23426200 |
| 0.72177500    | -0.25124500 |
| 0.11761200    | 0.55814300  |
| S 7 1.00      |             |
| 2473.84000000 | 0.00008100  |
| 359.74200000  | 0.00043700  |
| 24.48800000   | 0.02995000  |
| 8.38751000    | -0.23868800 |
| 1.72801000    | 0.91993700  |
| 0.72177500    | -0.37908000 |
| 0.11761200    | -1.65503900 |
| S 1 1.00      |             |
| 0.04234500    | 1.00000000  |
| P 6 1.00      |             |
| 64.89790000   | 0.00341300  |
| 12.47620000   | -0.06656400 |
| 3.24634000    | 0.34921700  |

|             |             |
|-------------|-------------|
| 1.45250000  | 0.50902000  |
| 0.62102400  | 0.25794700  |
| 0.16219100  | 0.01950900  |
| P 6 1.00    |             |
| 64.89790000 | -0.00070700 |
| 12.47620000 | 0.01518800  |
| 3.24634000  | -0.09188400 |
| 1.45250000  | -0.15848800 |
| 0.62102400  | -0.01210600 |
| 0.16219100  | 0.53486500  |
| P 6 1.00    |             |
| 64.89790000 | -0.00096400 |
| 12.47620000 | 0.02147200  |
| 3.24634000  | -0.13033700 |
| 1.45250000  | -0.24593200 |
| 0.62102400  | 0.03583900  |
| 0.16219100  | 0.82279400  |
| P 1 1.00    |             |
| 0.05045400  | 1.00000000  |
| D 5 1.00    |             |
| 38.83200000 | 0.02115200  |
| 12.16880000 | 0.11299100  |
| 4.35712000  | 0.29456800  |
| 1.59467000  | 0.42403200  |
| 0.54388300  | 0.37571200  |
| D 5 1.00    |             |
| 38.83200000 | -0.02336100 |
| 12.16880000 | -0.12793700 |
| 4.35712000  | -0.33745000 |
| 1.59467000  | -0.30119800 |
| 0.54388300  | 0.36307300  |
| D 1 1.00    |             |
| 0.15752500  | 1.00000000  |
| F 1 1.00    |             |
| 1.62120000  | 1.00000000  |

\*\*\*\*

Fe 0

FE-ECP 4 10

G POTENTIAL

1

|   |            |            |
|---|------------|------------|
| 2 | 1.00000000 | 0.00000000 |
|---|------------|------------|

S-G POTENTIAL

2

|   |             |              |
|---|-------------|--------------|
| 2 | 22.14297277 | 239.74474466 |
|---|-------------|--------------|

|   |            |             |
|---|------------|-------------|
| 2 | 9.28465503 | 46.15501318 |
|---|------------|-------------|

P-G POTENTIAL

4

|   |             |             |
|---|-------------|-------------|
| 2 | 22.28449301 | 43.75598234 |
|---|-------------|-------------|

|   |             |             |
|---|-------------|-------------|
| 2 | 22.16423924 | 74.60461922 |
|---|-------------|-------------|

|   |            |             |
|---|------------|-------------|
| 2 | 9.38245156 | 11.35204140 |
|---|------------|-------------|

|   |            |             |
|---|------------|-------------|
| 2 | 9.46218842 | 25.97902224 |
|---|------------|-------------|

D-G POTENTIAL

4

|   |             |             |
|---|-------------|-------------|
| 2 | 26.69705846 | -8.78327657 |
|---|-------------|-------------|

|   |             |              |
|---|-------------|--------------|
| 2 | 26.89933437 | -13.18404835 |
|---|-------------|--------------|

|   |            |             |
|---|------------|-------------|
| 2 | 8.97801127 | -0.51002419 |
|---|------------|-------------|

|   |            |             |
|---|------------|-------------|
| 2 | 8.94834948 | -0.72953808 |
|---|------------|-------------|

F-G POTENTIAL

2  
2 13.46316084 -2.77838720  
2 16.56769645 -5.89469136

**OPBE Water Coordinates Energy -76.4048721826**

O 0.00000 0.124352 0.00000  
H 0.781337 -0.497604 0.00000  
H -0.781337 -0.497215 0.00000

**OPBE Pyridine Energy -248.2114029380**

C -7.40000e-05 1.39115 1.70000e-05  
C -1.20681 0.677053 5.90000e-05  
C -1.15606 -0.723596 -0.000292000  
N -5.00000e-06 -1.43510 7.10000e-05  
C 1.15610 -0.723301 4.80000e-05  
C 1.20686 0.676873 -8.00000e-05  
H -8.50000e-05 2.48109 0.000135000  
H -2.16544 1.19452 0.000201000  
H -2.07836 -1.30672 0.000547000  
H 2.07832 -1.30658 0.000158000  
H 2.16553 1.19427 -5.00000e-05

**OPBE Doublet Heme-Pyridine Ligand Energy -1758.7810192200**

N -1.39555 1.40764 -0.409839  
C -1.22144 2.77925 -0.250637  
C -2.49976 3.46273 -0.343424  
C -3.44703 2.50479 -0.594222  
C -2.75999 1.22531 -0.623762  
C -3.39718 0.000811000 -0.756806  
C -2.75925 -1.22372 -0.621479  
N -1.39317 -1.40506 -0.410412  
C -1.21973 -2.77705 -0.238452  
C 1.22184 -2.77614 -0.238403  
N 1.39423 -1.40402 -0.410329  
C 2.76018 -1.22163 -0.621410  
C -3.44545 -2.50233 -0.581939  
C -2.49791 -3.45955 -0.325046  
C -0.00131500 3.42423 -0.121546  
C 1.21929 2.78017 -0.250643  
N 1.39444 1.40870 -0.409840  
C 2.75903 1.22740 -0.623723  
C 3.44509 2.50741 -0.594195  
C 2.49710 3.46462 -0.343401  
C 3.39716 0.00339200 -0.756729  
C 3.44734 -2.49972 -0.581884  
C 2.50053 -3.45766 -0.325015  
H -2.63256 4.53441 -0.251164  
H -4.51318 2.63411 -0.741310  
H -4.51214 -2.63250 -0.724728  
H -2.63209 -4.53022 -0.222773  
H 4.51115 2.63753 -0.741268  
H 2.62909 4.53641 -0.251136  
H 4.51413 -2.62908 -0.724684  
H 2.63552 -4.52823 -0.222774  
Fe -1.60000e-05 0.00109800 -0.422407

|   |              |             |             |
|---|--------------|-------------|-------------|
| S | 0.000191000  | 0.0454660   | -2.65553    |
| H | -0.000262000 | -1.31321    | -2.90764    |
| C | 0.00128800   | -3.42055    | -0.105202   |
| H | 0.00168500   | -4.50191    | 0.0199130   |
| H | 4.47370      | 0.00363500  | -0.919707   |
| H | -0.00172500  | 4.50673     | -0.00723300 |
| H | -4.47372     | 0.000222000 | -0.919796   |
| N | -1.70000e-05 | 0.00589000  | 1.59954     |
| C | -1.16820     | 0.00597400  | 2.29913     |
| H | -2.08039     | 0.00694700  | 1.71480     |
| C | 1.16816      | 0.00626500  | 2.29913     |
| H | 2.08035      | 0.00742500  | 1.71481     |
| C | 1.20288      | 0.00503000  | 3.69558     |
| C | -1.20291     | 0.00474000  | 3.69558     |
| H | 2.16515      | 0.00517100  | 4.20441     |
| C | -2.10000e-05 | 0.00402600  | 4.41354     |
| H | -2.16519     | 0.00464200  | 4.20441     |
| H | -1.40000e-05 | 0.00298900  | 5.50294     |

**OPBE Heme-Water complex Energy -1586.9733790300**

|    |             |            |             |
|----|-------------|------------|-------------|
| N  | -1.41992    | 1.40047    | -0.113101   |
| C  | -2.80266    | 1.22571    | -0.125015   |
| C  | -3.47736    | 2.51144    | -0.109429   |
| C  | -2.50158    | 3.47078    | -0.0755420  |
| C  | -1.22515    | 2.77802    | -0.0752980  |
| C  | -0.00123300 | 3.42303    | -0.0512030  |
| C  | 1.22225     | 2.77618    | -0.0719220  |
| N  | 1.41579     | 1.39726    | -0.107073   |
| C  | 2.80003     | 1.22214    | -0.132079   |
| C  | 2.80563     | -1.21863   | -0.125107   |
| N  | 1.41691     | -1.38996   | -0.115748   |
| C  | 1.22048     | -2.77303   | -0.0561900  |
| C  | 2.49882     | 3.46706    | -0.0793870  |
| C  | 3.47459     | 2.50715    | -0.119956   |
| C  | -3.46173    | 0.00798300 | -0.131277   |
| C  | -2.81131    | -1.21414   | -0.110516   |
| N  | -1.42468    | -1.38875   | -0.113734   |
| C  | -1.23086    | -2.77092   | -0.0521360  |
| C  | -2.50742    | -3.45864   | -0.0294340  |
| C  | -3.48371    | -2.49738   | -0.0677250  |
| C  | -0.00599000 | -3.41670   | -0.0275800  |
| C  | 2.49518     | -3.46225   | -0.0444720  |
| C  | 3.47425     | -2.50293   | -0.0894410  |
| H  | -4.55318    | 2.64106    | -0.118685   |
| H  | -2.61516    | 4.54835    | -0.0526080  |
| H  | 2.61330     | 4.54464    | -0.0594350  |
| H  | 4.55033     | 2.63692    | -0.138812   |
| H  | -2.62401    | -4.53533   | 0.0156720   |
| H  | -4.55955    | -2.62774   | -0.0606810  |
| H  | 2.61007     | -4.53933   | -0.00354600 |
| H  | 4.54975     | -2.63664   | -0.0932190  |
| Fe | -0.00155700 | 0.0147770  | -0.0480240  |
| S  | -0.0422600  | 0.0340350  | 2.17263     |
| H  | 1.31714     | 0.0590620  | 2.42043     |
| C  | 3.45767     | 0.00321200 | -0.145932   |
| H  | 4.54605     | 0.00574400 | -0.155657   |
| H  | -0.00666000 | -4.50454   | 0.0195310   |
| H  | -4.55005    | 0.0119180  | -0.130007   |



|   |              |            |            |
|---|--------------|------------|------------|
| H | -0.000286000 | 4.51132    | -0.0230600 |
| O | -0.00872200  | -0.0531970 | -2.12566   |
| H | -0.824416    | -0.588992  | -2.33017   |
| H | 0.776931     | -0.631368  | -2.33255   |

**OPBE Heme No Ligand Doublet Energy -1510.5671352200**

|    |            |              |             |
|----|------------|--------------|-------------|
| N  | 1.41729    | -1.39909     | -0.220421   |
| C  | 2.79560    | -1.23200     | -0.301362   |
| C  | 3.47331    | -2.50635     | -0.286020   |
| C  | 2.50317    | -3.46522     | -0.172202   |
| C  | 1.23593    | -2.77409     | -0.134796   |
| C  | 0.00274700 | -3.41444     | -0.0731020  |
| C  | -1.22935   | -2.77186     | -0.140080   |
| N  | -1.40855   | -1.39620     | -0.226587   |
| C  | -2.78684   | -1.22722     | -0.315435   |
| C  | -2.78457   | 1.23222      | -0.315987   |
| N  | -1.40601   | 1.39874      | -0.226729   |
| C  | -1.22434   | 2.77412      | -0.140646   |
| C  | -2.49721   | -3.46073     | -0.184577   |
| C  | -3.46589   | -2.50052     | -0.303621   |
| C  | 3.44451    | -0.00305700  | -0.355568   |
| C  | 2.79783    | 1.22704      | -0.300746   |
| N  | 1.41979    | 1.39659      | -0.220227   |
| C  | 1.24092    | 2.77189      | -0.134180   |
| C  | 2.50943    | 3.46072      | -0.170810   |
| C  | 3.47786    | 2.50014      | -0.284580   |
| C  | 0.00887800 | 3.41447      | -0.0730830  |
| C  | -2.49093   | 3.46525      | -0.185893   |
| C  | -3.46131   | 2.50676      | -0.304996   |
| H  | 4.55485    | -2.63168     | -0.351581   |
| H  | 2.61639    | -4.54928     | -0.127218   |
| H  | -2.61213   | -4.54468     | -0.141094   |
| H  | -4.54717   | -2.62480     | -0.375809   |
| H  | 2.62460    | 4.54455      | -0.125448   |
| H  | 4.55966    | 2.62353      | -0.349736   |
| H  | -2.60389   | 4.54943      | -0.142793   |
| H  | -4.54232   | 2.63296      | -0.377601   |
| Fe | 0.00297400 | -1.00000e-05 | -0.0247650  |
| S  | 0.0199970  | -0.000178000 | 2.16676     |
| H  | -1.32646   | 0.00153500   | 2.40149     |
| C  | -3.43326   | 0.00308900   | -0.373299   |
| H  | -4.52494   | 0.00409100   | -0.438701   |
| H  | 0.00956000 | 4.50630      | -0.00924400 |
| H  | 4.53654    | -0.00403600  | -0.413548   |
| H  | 0.00147900 | -4.50628     | -0.00925600 |

**OPBE Heme Sextet No Ligand Energy -1510.5789197200**

|   |            |          |            |
|---|------------|----------|------------|
| N | 1.40762    | -1.39184 | -0.211375  |
| C | 2.77617    | -1.22549 | -0.293937  |
| C | 3.45789    | -2.49128 | -0.285793  |
| C | 2.49188    | -3.44930 | -0.174899  |
| C | 1.23163    | -2.75844 | -0.132068  |
| C | 0.00396800 | -3.40091 | -0.0713870 |
| C | -1.22334   | -2.75731 | -0.135204  |
| N | -1.39930   | -1.39013 | -0.215090  |
| C | -2.76817   | -1.22416 | -0.306138  |
| C | -2.76753   | 1.22557  | -0.306367  |

|    |            |              |            |
|----|------------|--------------|------------|
| N  | -1.39857   | 1.39085      | -0.215167  |
| C  | -1.22193   | 2.75794      | -0.135446  |
| C  | -2.48318   | -3.44762     | -0.184837  |
| C  | -3.44927   | -2.48981     | -0.301515  |
| C  | 3.42479    | -0.000865000 | -0.349789  |
| C  | 2.77681    | 1.22409      | -0.293696  |
| N  | 1.40834    | 1.39114      | -0.211308  |
| C  | 1.23304    | 2.75781      | -0.131836  |
| C  | 2.49365    | 3.44803      | -0.174359  |
| C  | 3.45918    | 2.48952      | -0.285220  |
| C  | 0.00569500 | 3.40091      | -0.0713930 |
| C  | -2.48141   | 3.44890      | -0.185353  |
| C  | -3.44796   | 2.49158      | -0.302070  |
| H  | 4.53924    | -2.61559     | -0.356045  |
| H  | 2.60760    | -4.53338     | -0.136143  |
| H  | -2.59889   | -4.53178     | -0.147733  |
| H  | -4.53007   | -2.61474     | -0.378833  |
| H  | 2.60993    | 4.53205      | -0.135430  |
| H  | 4.54061    | 2.61328      | -0.355273  |
| H  | -2.59656   | 4.53312      | -0.148408  |
| H  | -4.52869   | 2.61706      | -0.379578  |
| Fe | 0.00161500 | -9.00000e-06 | -0.0187240 |
| S  | 0.0313150  | -4.80000e-05 | 2.11859    |
| H  | -1.30594   | 0.000657000  | 2.38876    |
| C  | -3.41602   | 0.000871000  | -0.365448  |
| H  | -4.50635   | 0.00115500   | -0.434770  |
| H  | 0.00550000 | 4.49193      | -0.0121190 |
| H  | 4.51550    | -0.00114600  | -0.411744  |
| H  | 0.00321900 | -4.49192     | -0.0121170 |

**B3LYP Water Energy -76.4169106417**

|   |           |          |         |
|---|-----------|----------|---------|
| O | 0.00000   | 0.00000  | 0.00000 |
| H | -0.922641 | 0.652406 | 0.00000 |
| H | 0.922641  | 0.652406 | 0.00000 |

**B3LYP Pyridine Energy -248.3042282930**

|   |            |           |         |
|---|------------|-----------|---------|
| C | 0.00000    | 1.38700   | 0.00000 |
| C | 1.20000    | 0.674000  | 0.00000 |
| C | 1.14600    | -0.722000 | 0.00000 |
| N | 0.00000    | -1.42300  | 0.00000 |
| C | -1.14600   | -0.722000 | 0.00000 |
| C | -1.20000   | 0.674000  | 0.00000 |
| H | 0.00100000 | 2.47000   | 0.00000 |
| H | 2.15500    | 1.18400   | 0.00000 |
| H | 2.06000    | -1.30900  | 0.00000 |
| H | -2.06100   | -1.30700  | 0.00000 |
| H | -2.15600   | 1.18200   | 0.00000 |

**B3LYP Heme-Pyridine Energy -1759.0416209400**

|   |          |            |           |
|---|----------|------------|-----------|
| N | -1.43409 | 1.40878    | -0.401520 |
| C | -1.26316 | 2.78458    | -0.338530 |
| C | -2.55537 | 3.44188    | -0.409080 |
| C | -3.49709 | 2.46616    | -0.535220 |
| C | -2.79998 | 1.19236    | -0.531160 |
| C | -3.41927 | -0.0432800 | -0.599270 |
| C | -2.76553 | -1.26196   | -0.533620 |

|    |              |              |           |
|----|--------------|--------------|-----------|
| N  | -1.39304     | -1.44105     | -0.410100 |
| C  | -1.18478     | -2.81309     | -0.341680 |
| C  | 1.26355      | -2.77893     | -0.343420 |
| N  | 1.43318      | -1.40149     | -0.411490 |
| C  | 2.80015      | -1.18406     | -0.535780 |
| C  | -3.42691     | -2.55371     | -0.532650 |
| C  | -2.45850     | -3.50406     | -0.406880 |
| C  | -0.0482700   | 3.44261      | -0.278200 |
| C  | 1.18451      | 2.81866      | -0.336780 |
| N  | 1.39408      | 1.44819      | -0.400000 |
| C  | 2.76546      | 1.27022      | -0.529410 |
| C  | 3.42657      | 2.56305      | -0.532550 |
| C  | 2.45782      | 3.51193      | -0.406450 |
| C  | 3.41931      | 0.0526500    | -0.599700 |
| C  | 3.49741      | -2.45682     | -0.536040 |
| C  | 2.55605      | -3.43394     | -0.409980 |
| H  | -2.69966     | 4.50993      | -0.379740 |
| H  | -4.56568     | 2.57709      | -0.627020 |
| H  | -4.49248     | -2.69402     | -0.619550 |
| H  | -2.57481     | -4.57543     | -0.372840 |
| H  | 4.49165      | 2.70393      | -0.624010 |
| H  | 2.57211      | 4.58359      | -0.376750 |
| H  | 4.56644      | -2.56722     | -0.623690 |
| H  | 2.70232      | -4.50166     | -0.376440 |
| Fe | -2.00000e-05 | 0.00212000   | -0.445380 |
| S  | -0.00289000  | 0.0616500    | -2.72059  |
| H  | 0.0342800    | -1.29354     | -2.97424  |
| C  | 0.0483600    | -3.43712     | -0.282770 |
| H  | 0.0635100    | -4.51999     | -0.239330 |
| H  | 4.49891      | 0.0681000    | -0.695530 |
| H  | -0.0633700   | 4.52559      | -0.239730 |
| H  | -4.49890     | -0.0584800   | -0.694840 |
| N  | 5.00000e-05  | -0.00155000  | 1.66851   |
| C  | -1.16576     | -0.00992000  | 2.36076   |
| H  | -2.07312     | -0.0100800   | 1.77764   |
| C  | 1.16603      | -0.000310000 | 2.36052   |
| H  | 2.07325      | 0.00604000   | 1.77722   |
| C  | 1.20069      | -0.00689000  | 3.75164   |
| C  | -1.20006     | -0.0171100   | 3.75190   |
| H  | 2.15479      | -0.00522000  | 4.26205   |
| C  | 0.000400000  | -0.0155200   | 4.46270   |
| H  | -2.15404     | -0.0236100   | 4.26251   |
| H  | 0.000550000  | -0.0208000   | 5.54598   |

**B3LYP Heme-Water Energy -1587.1717166900**

|   |              |          |            |
|---|--------------|----------|------------|
| N | -1.43326     | 1.41603  | -0.125510  |
| C | -2.80979     | 1.23230  | -0.113950  |
| C | -3.47697     | 2.52136  | -0.0920900 |
| C | -2.50644     | 3.47528  | -0.0819200 |
| C | -1.22720     | 2.78749  | -0.0980000 |
| C | -0.000630000 | 3.42324  | -0.0875900 |
| C | 1.22574      | 2.78586  | -0.0982400 |
| N | 1.43046      | 1.41336  | -0.120450  |
| C | 2.80852      | 1.22856  | -0.119340  |
| C | 2.81414      | -1.21778 | -0.118350  |
| N | 1.43140      | -1.39952 | -0.143420  |
| C | 1.22357      | -2.77697 | -0.0887400 |
| C | 2.50523      | 3.47163  | -0.0908100 |

|    |              |              |             |
|----|--------------|--------------|-------------|
| C  | 3.47569      | 2.51674      | -0.104330   |
| C  | -3.45945     | 0.0119800    | -0.111310   |
| C  | -2.81922     | -1.21320     | -0.112950   |
| N  | -1.43874     | -1.39817     | -0.148560   |
| C  | -1.23355     | -2.77503     | -0.0884000  |
| C  | -2.51238     | -3.45576     | -0.0450100  |
| C  | -3.48332     | -2.49883     | -0.0602900  |
| C  | -0.00580000  | -3.41119     | -0.0722800  |
| C  | 2.50079      | -3.45965     | -0.0542900  |
| C  | 3.47453      | -2.50470     | -0.0728800  |
| H  | -4.54664     | 2.65490      | -0.0820000  |
| H  | -2.62241     | 4.54688      | -0.0619900  |
| H  | 2.62247      | 4.54321      | -0.0756200  |
| H  | 4.54546      | 2.65036      | -0.102680   |
| H  | -2.63233     | -4.52629     | 0.000520000 |
| H  | -4.55262     | -2.63306     | -0.0303000  |
| H  | 2.61892      | -4.53062     | -0.0138300  |
| H  | 4.54367      | -2.64232     | -0.0515900  |
| Fe | -0.000550000 | 0.0177800    | -0.0431300  |
| S  | -0.0537100   | 0.00111000   | 2.21552     |
| H  | 1.30224      | -0.000710000 | 2.46715     |
| C  | 3.45646      | 0.00684000   | -0.119750   |
| H  | 4.54003      | 0.00946000   | -0.105260   |
| H  | -0.00651000  | -4.49429     | -0.0271700  |
| H  | -4.54276     | 0.0163000    | -0.0871600  |
| H  | 0.000210000  | 4.50688      | -0.0673200  |
| O  | -0.00246000  | -0.0590700   | -2.09351    |
| H  | -0.807380    | -0.609630    | -2.29660    |
| H  | 0.802490     | -0.609480    | -2.29639    |

**B3LYP Heme No Ligand Doublet Energy -1510.7228331500**

|   |            |             |            |
|---|------------|-------------|------------|
| N | 1.42050    | -1.40375    | -0.222233  |
| C | 2.78823    | -1.22814    | -0.302464  |
| C | 3.46721    | -2.50068    | -0.294025  |
| C | 2.50258    | -3.45835    | -0.188550  |
| C | 1.23516    | -2.76978    | -0.147533  |
| C | 0.00463300 | -3.40896    | -0.0908400 |
| C | -1.22619   | -2.76977    | -0.150701  |
| N | -1.41228   | -1.40351    | -0.224872  |
| C | -2.78029   | -1.22851    | -0.313508  |
| C | -2.78039   | 1.22827     | -0.313613  |
| N | -1.41240   | 1.40339     | -0.224895  |
| C | -1.22644   | 2.76967     | -0.150815  |
| C | -2.49286   | -3.45854    | -0.198367  |
| C | -3.45796   | -2.50131    | -0.308700  |
| C | 3.43238    | 0.000156000 | -0.352205  |
| C | 2.78812    | 1.22839     | -0.302351  |
| N | 1.42038    | 1.40388     | -0.222215  |
| C | 1.23491    | 2.76988     | -0.147426  |
| C | 2.50228    | 3.45857     | -0.188288  |
| C | 3.46700    | 2.50099     | -0.293739  |
| C | 0.00432800 | 3.40896     | -0.0908440 |
| C | -2.49316   | 3.45833     | -0.198609  |
| C | -3.45817   | 2.50101     | -0.308976  |
| H | 4.54624    | -2.62604    | -0.356626  |
| H | 2.61982    | -4.53944    | -0.149412  |
| H | -2.60965   | -4.53976    | -0.161100  |
| H | -4.53648   | -2.62778    | -0.378090  |

|    |            |              |             |
|----|------------|--------------|-------------|
| H  | 2.61942    | 4.53967      | -0.149061   |
| H  | 4.54602    | 2.62645      | -0.356231   |
| H  | -2.61004   | 4.53955      | -0.161420   |
| H  | -4.53669   | 2.62738      | -0.378468   |
| Fe | 0.00141100 | -8.00000e-06 | -0.00775800 |
| S  | 0.0359490  | -3.20000e-05 | 2.20482     |
| H  | -1.30323   | 0.000231000  | 2.44628     |
| C  | -3.42432   | -0.000148000 | -0.367589   |
| H  | -4.51321   | -0.000195000 | -0.433445   |
| H  | 0.00403400 | 4.49854      | -0.0367260  |
| H  | 4.52168    | 0.000204000  | -0.409962   |
| H  | 0.00443400 | -4.49853     | -0.0367250  |

**B3LYP Heme No Ligand Sextet Energy -1510.7334436100**

|    |            |             |             |
|----|------------|-------------|-------------|
| N  | 1.56267    | -1.24205    | -0.213860   |
| C  | 2.90450    | -0.917540   | -0.268540   |
| C  | 3.71712    | -2.11740    | -0.256440   |
| C  | 2.85933    | -3.17173    | -0.183610   |
| C  | 1.51821    | -2.62094    | -0.159690   |
| C  | 0.368580   | -3.38808    | -0.131310   |
| C  | -0.916680  | -2.88056    | -0.185240   |
| N  | -1.25249   | -1.54127    | -0.234370   |
| C  | -2.63347   | -1.50908    | -0.302300   |
| C  | -2.89598   | 0.920260    | -0.278430   |
| N  | -1.55333   | 1.24391     | -0.212340   |
| C  | -1.50860   | 2.62341     | -0.160630   |
| C  | -2.10910   | -3.70235    | -0.232500   |
| C  | -3.17120   | -2.85366    | -0.310420   |
| C  | 3.41526    | 0.366280    | -0.311790   |
| C  | 2.64162    | 1.51173     | -0.288900   |
| N  | 1.26097    | 1.54485     | -0.230940   |
| C  | 0.926100   | 2.88392     | -0.179970   |
| C  | 2.11953    | 3.70558     | -0.218510   |
| C  | 3.18097    | 2.85628     | -0.291170   |
| C  | -0.358910  | 3.39119     | -0.129300   |
| C  | -2.84888   | 3.17437     | -0.193430   |
| C  | -3.70724   | 2.12034     | -0.271750   |
| H  | 4.79538    | -2.12660    | -0.298120   |
| H  | 3.08785    | -4.22605    | -0.155490   |
| H  | -2.10892   | -4.78137    | -0.214220   |
| H  | -4.22216   | -3.09200    | -0.367240   |
| H  | 2.11994    | 4.78453     | -0.197020   |
| H  | 4.23258    | 3.09343     | -0.339560   |
| H  | -3.07701   | 4.22888     | -0.168790   |
| H  | -4.78513   | 2.13070     | -0.322560   |
| Fe | 0.00248000 | 0.000780000 | -0.00969000 |
| S  | 0.0309200  | -0.0122600  | 2.19642     |
| H  | -1.30864   | -0.0517600  | 2.41216     |
| C  | -3.40704   | -0.363410   | -0.327940   |
| H  | -4.48386   | -0.479400   | -0.374520   |
| H  | -0.473850  | 4.46858     | -0.0918200  |
| H  | 4.49238    | 0.482660    | -0.348310   |
| H  | 0.482740   | -4.46554    | -0.0934800  |

**B3LYP Heme-Pyridine Energy -1759.0416209400**

|   |          |         |           |
|---|----------|---------|-----------|
| N | -1.43409 | 1.40878 | -0.401520 |
| C | -1.26316 | 2.78458 | -0.338530 |

|    |              |              |           |
|----|--------------|--------------|-----------|
| C  | -2.55537     | 3.44188      | -0.409080 |
| C  | -3.49709     | 2.46616      | -0.535220 |
| C  | -2.79998     | 1.19236      | -0.531160 |
| C  | -3.41927     | -0.0432800   | -0.599270 |
| C  | -2.76553     | -1.26196     | -0.533620 |
| N  | -1.39304     | -1.44105     | -0.410100 |
| C  | -1.18478     | -2.81309     | -0.341680 |
| C  | 1.26355      | -2.77893     | -0.343420 |
| N  | 1.43318      | -1.40149     | -0.411490 |
| C  | 2.80015      | -1.18406     | -0.535780 |
| C  | -3.42691     | -2.55371     | -0.532650 |
| C  | -2.45850     | -3.50406     | -0.406880 |
| C  | -0.0482700   | 3.44261      | -0.278200 |
| C  | 1.18451      | 2.81866      | -0.336780 |
| N  | 1.39408      | 1.44819      | -0.400000 |
| C  | 2.76546      | 1.27022      | -0.529410 |
| C  | 3.42657      | 2.56305      | -0.532550 |
| C  | 2.45782      | 3.51193      | -0.406450 |
| C  | 3.41931      | 0.0526500    | -0.599700 |
| C  | 3.49741      | -2.45682     | -0.536040 |
| C  | 2.55605      | -3.43394     | -0.409980 |
| H  | -2.69966     | 4.50993      | -0.379740 |
| H  | -4.56568     | 2.57709      | -0.627020 |
| H  | -4.49248     | -2.69402     | -0.619550 |
| H  | -2.57481     | -4.57543     | -0.372840 |
| H  | 4.49165      | 2.70393      | -0.624010 |
| H  | 2.57211      | 4.58359      | -0.376750 |
| H  | 4.56644      | -2.56722     | -0.623690 |
| H  | 2.70232      | -4.50166     | -0.376440 |
| Fe | -2.00000e-05 | 0.00212000   | -0.445380 |
| S  | -0.00289000  | 0.0616500    | -2.72059  |
| H  | 0.0342800    | -1.29354     | -2.97424  |
| C  | 0.0483600    | -3.43712     | -0.282770 |
| H  | 0.0635100    | -4.51999     | -0.239330 |
| H  | 4.49891      | 0.0681000    | -0.695530 |
| H  | -0.0633700   | 4.52559      | -0.239730 |
| H  | -4.49890     | -0.0584800   | -0.694840 |
| N  | 5.00000e-05  | -0.00155000  | 1.66851   |
| C  | -1.16576     | -0.00992000  | 2.36076   |
| H  | -2.07312     | -0.0100800   | 1.77764   |
| C  | 1.16603      | -0.000310000 | 2.36052   |
| H  | 2.07325      | 0.00604000   | 1.77722   |
| C  | 1.20069      | -0.00689000  | 3.75164   |
| C  | -1.20006     | -0.0171100   | 3.75190   |
| H  | 2.15479      | -0.00522000  | 4.26205   |
| C  | 0.000400000  | -0.0155200   | 4.46270   |
| H  | -2.15404     | -0.0236100   | 4.26251   |
| H  | 0.000550000  | -0.0208000   | 5.54598   |

**TPSS Triplet Molecular Oxygen Energy -150.3707088940**

|   |         |         |         |
|---|---------|---------|---------|
| O | 0.00000 | 0.00000 | 0.00000 |
| O | 1.46000 | 0.00000 | 0.00000 |

**TPSS Water Energy -76.4415112070**

|   |          |          |         |
|---|----------|----------|---------|
| O | 0.00000  | 0.00000  | 0.00000 |
| H | 0.922641 | 0.652406 | 0.00000 |

H -0.922641 0.652406 0.00000

**TPSS Pyridine Energy -248.3539872730**

C 0.00000 1.38700 0.00000  
C 1.20000 0.674000 0.00000  
C 1.14600 -0.722000 0.00000  
N 0.00000 -1.42300 0.00000  
C -1.14600 -0.722000 0.00000  
C -1.20000 0.674000 0.00000  
H 0.00100000 2.47000 0.00000  
H 2.15500 1.18400 0.00000  
H 2.06000 -1.30900 0.00000  
H -2.06100 -1.30700 0.00000  
H -2.15600 1.18200 0.00000

**TPSS Heme Doublet No Ligand Energy -1510.9240188700**

N 1.56267 -1.24205 -0.213860  
C 2.90450 -0.917540 -0.268540  
C 3.71712 -2.11740 -0.256440  
C 2.85933 -3.17173 -0.183610  
C 1.51821 -2.62094 -0.159690  
C 0.368580 -3.38808 -0.131310  
C -0.916680 -2.88056 -0.185240  
N -1.25249 -1.54127 -0.234370  
C -2.63347 -1.50908 -0.302300  
C -2.89598 0.920260 -0.278430  
N -1.55333 1.24391 -0.212340  
C -1.50860 2.62341 -0.160630  
C -2.10910 -3.70235 -0.232500  
C -3.17120 -2.85366 -0.310420  
C 3.41526 0.366280 -0.311790  
C 2.64162 1.51173 -0.288900  
N 1.26097 1.54485 -0.230940  
C 0.926100 2.88392 -0.179970  
C 2.11953 3.70558 -0.218510  
C 3.18097 2.85628 -0.291170  
C -0.358910 3.39119 -0.129300  
C -2.84888 3.17437 -0.193430  
C -3.70724 2.12034 -0.271750  
H 4.79538 -2.12660 -0.298120  
H 3.08785 -4.22605 -0.155490  
H -2.10892 -4.78137 -0.214220  
H -4.22216 -3.09200 -0.367240  
H 2.11994 4.78453 -0.197020  
H 4.23258 3.09343 -0.339560  
H -3.07701 4.22888 -0.168790  
H -4.78513 2.13070 -0.322560  
Fe 0.00248000 0.000780000 -0.00969000  
S 0.0309200 -0.0122600 2.19642  
H -1.30864 -0.0517600 2.41216  
C -3.40704 -0.363410 -0.327940  
H -4.48386 -0.479400 -0.374520  
H -0.473850 4.46858 -0.0918200  
H 4.49238 0.482660 -0.348310  
H 0.482740 -4.46554 -0.0934800

**TPSS Heme Sextet No Ligand Energy -1510.9169410200**

|    |            |             |             |
|----|------------|-------------|-------------|
| N  | 1.56267    | -1.24205    | -0.213860   |
| C  | 2.90450    | -0.917540   | -0.268540   |
| C  | 3.71712    | -2.11740    | -0.256440   |
| C  | 2.85933    | -3.17173    | -0.183610   |
| C  | 1.51821    | -2.62094    | -0.159690   |
| C  | 0.368580   | -3.38808    | -0.131310   |
| C  | -0.916680  | -2.88056    | -0.185240   |
| N  | -1.25249   | -1.54127    | -0.234370   |
| C  | -2.63347   | -1.50908    | -0.302300   |
| C  | -2.89598   | 0.920260    | -0.278430   |
| N  | -1.55333   | 1.24391     | -0.212340   |
| C  | -1.50860   | 2.62341     | -0.160630   |
| C  | -2.10910   | -3.70235    | -0.232500   |
| C  | -3.17120   | -2.85366    | -0.310420   |
| C  | 3.41526    | 0.366280    | -0.311790   |
| C  | 2.64162    | 1.51173     | -0.288900   |
| N  | 1.26097    | 1.54485     | -0.230940   |
| C  | 0.926100   | 2.88392     | -0.179970   |
| C  | 2.11953    | 3.70558     | -0.218510   |
| C  | 3.18097    | 2.85628     | -0.291170   |
| C  | -0.358910  | 3.39119     | -0.129300   |
| C  | -2.84888   | 3.17437     | -0.193430   |
| C  | -3.70724   | 2.12034     | -0.271750   |
| H  | 4.79538    | -2.12660    | -0.298120   |
| H  | 3.08785    | -4.22605    | -0.155490   |
| H  | -2.10892   | -4.78137    | -0.214220   |
| H  | -4.22216   | -3.09200    | -0.367240   |
| H  | 2.11994    | 4.78453     | -0.197020   |
| H  | 4.23258    | 3.09343     | -0.339560   |
| H  | -3.07701   | 4.22888     | -0.168790   |
| H  | -4.78513   | 2.13070     | -0.322560   |
| Fe | 0.00248000 | 0.000780000 | -0.00969000 |
| S  | 0.0309200  | -0.0122600  | 2.19642     |
| H  | -1.30864   | -0.0517600  | 2.41216     |
| C  | -3.40704   | -0.363410   | -0.327940   |
| H  | -4.48386   | -0.479400   | -0.374520   |
| H  | -0.473850  | 4.46858     | -0.0918200  |
| H  | 4.49238    | 0.482660    | -0.348310   |
| H  | 0.482740   | -4.46554    | -0.0934800  |

**TPSS Heme-Water Energy -1587.3789680300**

|   |            |           |            |
|---|------------|-----------|------------|
| N | -1.43299   | 1.42118   | -0.115410  |
| C | -2.79802   | 1.24482   | -0.121520  |
| C | -3.47198   | 2.52333   | -0.106180  |
| C | -2.49870   | 3.47769   | -0.0809200 |
| C | -1.23161   | 2.78104   | -0.0834200 |
| C | 0.00554000 | 3.41487   | -0.0663200 |
| C | 1.23991    | 2.77484   | -0.0837300 |
| N | 1.43520    | 1.41371   | -0.112780  |
| C | 2.80003    | 1.23104   | -0.127140  |
| C | 2.79848    | -1.23390  | -0.125730  |
| N | 1.43016    | -1.40941  | -0.127890  |
| C | 1.22730    | -2.77252  | -0.0762300 |
| C | 2.51003    | 3.46525   | -0.0875400 |
| C | 3.47933    | 2.50639   | -0.116340  |
| C | -3.44860   | 0.0156900 | -0.127320  |
| C | -2.80911   | -1.21957  | -0.117600  |



|    |             |             |             |
|----|-------------|-------------|-------------|
| N  | -1.44250    | -1.40256    | -0.128080   |
| C  | -1.24714    | -2.76634    | -0.0734800  |
| C  | -2.51722    | -3.45364    | -0.0484000  |
| C  | -3.48685    | -2.49344    | -0.0778300  |
| C  | -0.0117000  | -3.40526    | -0.0526600  |
| C  | 2.49352     | -3.46640    | -0.0589100  |
| C  | 3.46881     | -2.51146    | -0.0918700  |
| H  | -4.55240    | 2.65377     | -0.111380   |
| H  | -2.60927    | 4.56021     | -0.0617800  |
| H  | 2.62565     | 4.54731     | -0.0713900  |
| H  | 4.56025     | 2.63246     | -0.128190   |
| H  | -2.63483    | -4.53493    | -0.00907000 |
| H  | -4.56775    | -2.61986    | -0.0672700  |
| H  | 2.60539     | -4.54844    | -0.0230900  |
| H  | 4.54900     | -2.64443    | -0.0885100  |
| Fe | 0.000110000 | 0.0143700   | 0.00203000  |
| S  | -0.0509400  | 0.00256000  | 2.22489     |
| H  | 1.28660     | 0.00765000  | 2.47223     |
| C  | 3.44430     | -0.00164000 | -0.137090   |
| H  | 4.53539     | -0.00232000 | -0.138060   |
| H  | -0.0142800  | -4.49566    | -0.0107800  |
| H  | -4.53957    | 0.0206300   | -0.120680   |
| H  | 0.00838000  | 4.50575     | -0.0429400  |
| O  | -0.00382000 | -0.0229500  | -2.22430    |
| H  | -0.778600   | -0.563800   | -2.45001    |
| H  | 0.761750    | -0.574510   | -2.45519    |

**TPSS Heme FE+2-Pyridine Energy -1759.4275243000**

|   |             |             |           |
|---|-------------|-------------|-----------|
| N | -1.41924    | 1.41634     | -0.414576 |
| C | -1.23950    | 2.78903     | -0.357458 |
| C | -2.51195    | 3.47851     | -0.416391 |
| C | -3.47721    | 2.51226     | -0.529431 |
| C | -2.78850    | 1.23763     | -0.525370 |
| C | -3.42831    | -0.00125900 | -0.589678 |
| C | -2.78712    | -1.23875    | -0.509183 |
| N | -1.41736    | -1.41569    | -0.396985 |
| C | -1.23715    | -2.78802    | -0.325990 |
| C | 1.23904     | -2.78734    | -0.326258 |
| N | 1.41801     | -1.41494    | -0.397114 |
| C | 2.78756     | -1.23645    | -0.509877 |
| C | -3.47503    | -2.51359    | -0.498536 |
| C | -2.50922    | -3.47854    | -0.376448 |
| C | -0.00196700 | 3.43154     | -0.304281 |
| C | 1.23633     | 2.79055     | -0.357496 |
| N | 1.41729     | 1.41815     | -0.414797 |
| C | 2.78672     | 1.24033     | -0.525224 |
| C | 3.47436     | 2.51555     | -0.528985 |
| C | 2.50827     | 3.48103     | -0.416097 |
| C | 3.42739     | 0.00183300  | -0.589989 |
| C | 3.47664     | -2.51067    | -0.499695 |
| C | 2.51180     | -3.47657    | -0.377337 |
| H | -2.63016    | 4.56416     | -0.390383 |
| H | -4.55987    | 2.63180     | -0.611574 |
| H | -4.55778    | -2.63437    | -0.577693 |
| H | -2.62715    | -4.56388    | -0.338007 |
| H | 4.55693     | 2.63607     | -0.610884 |
| H | 2.62564     | 4.56676     | -0.389961 |
| H | 4.55947     | -2.63050    | -0.579290 |

|    |             |              |           |
|----|-------------|--------------|-----------|
| H  | 2.63083     | -4.56181     | -0.339093 |
| Fe | 0.000661000 | -0.000586000 | -0.406057 |
| S  | 0.000715000 | 0.0205320    | -2.77142  |
| H  | 0.00181900  | -1.32750     | -2.98131  |
| C  | 0.00114000  | -3.42906     | -0.268586 |
| H  | 0.00141600  | -4.52355     | -0.222610 |
| H  | 4.51892     | 0.00150600   | -0.680553 |
| H  | -0.00267700 | 4.52636      | -0.269283 |
| H  | -4.51983    | -0.00260700  | -0.680154 |
| N  | 0.000582000 | 0.0165050    | 1.61274   |
| C  | -1.15976    | 0.0188780    | 2.32352   |
| H  | -2.07429    | 0.0176530    | 1.72595   |
| C  | 1.16089     | 0.0190780    | 2.32357   |
| H  | 2.07547     | 0.0180020    | 1.72607   |
| C  | 1.20094     | 0.0226420    | 3.72012   |
| C  | -1.19986    | 0.0224210    | 3.72006   |
| H  | 2.17228     | 0.0244910    | 4.22557   |
| C  | 0.000526000 | 0.0241100    | 4.44540   |
| H  | -2.17123    | 0.0240780    | 4.22548   |
| H  | 0.000504000 | 0.0267010    | 5.54086   |

**TPSS Heme Pyridine Ligand Fe3+ Energy -1759.2999094200**

|    |           |           |           |
|----|-----------|-----------|-----------|
| N  | 1.29744   | -1.22356  | -0.608358 |
| C  | 1.00462   | -2.57158  | -0.717060 |
| C  | 2.21698   | -3.34244  | -0.888382 |
| C  | 3.25306   | -2.44706  | -0.909819 |
| C  | 2.67359   | -1.13281  | -0.730129 |
| C  | 3.41278   | 0.0480720 | -0.641231 |
| C  | 2.88309   | 1.31124   | -0.370405 |
| N  | 1.53873   | 1.59137   | -0.190313 |
| C  | 1.47955   | 2.94221   | 0.108317  |
| C  | -0.982290 | 3.14957   | 0.135256  |
| N  | -1.27318  | 1.82895   | -0.162638 |
| C  | -2.64748  | 1.78085   | -0.325603 |
| C  | 3.67828   | 2.50476   | -0.177850 |
| C  | 2.80728   | 3.51554   | 0.132600  |
| C  | -0.281515 | -3.11155  | -0.729896 |
| C  | -1.45678  | -2.36061  | -0.711395 |
| N  | -1.51603  | -0.982245 | -0.599021 |
| C  | -2.85806  | -0.659612 | -0.706801 |
| C  | -3.65319  | -1.85610  | -0.884277 |
| C  | -2.78371  | -2.91416  | -0.873464 |
| C  | -3.38581  | 0.628238  | -0.600709 |
| C  | -3.22734  | 3.09006   | -0.116500 |
| C  | -2.19395  | 3.93805   | 0.183214  |
| H  | 2.25081   | -4.42765  | -0.994691 |
| H  | 4.31966   | -2.64176  | -1.03183  |
| H  | 4.76491   | 2.54520   | -0.267762 |
| H  | 3.02589   | 4.56287   | 0.346096  |
| H  | -4.73847  | -1.86692  | -0.995996 |
| H  | -3.00211  | -3.97763  | -0.980598 |
| H  | -4.29279  | 3.31354   | -0.189630 |
| H  | -2.22947  | 5.00615   | 0.402608  |
| Fe | 0.0128480 | 0.312135  | -0.437322 |
| S  | 0.0306530 | 0.610872  | -2.64494  |
| H  | 0.163808  | 1.96911   | -2.69209  |
| C  | 0.302896  | 3.66774   | 0.297248  |
| H  | 0.395059  | 4.73316   | 0.527177  |

|   |              |             |           |
|---|--------------|-------------|-----------|
| H | -4.46919     | 0.738188    | -0.705101 |
| H | -0.374938    | -4.19712    | -0.825966 |
| H | 4.49780      | -0.0276340  | -0.758053 |
| N | -0.000664000 | -0.00595500 | 1.65557   |
| C | 1.15785      | -0.104865   | 2.34973   |
| H | 2.06955      | -0.156525   | 1.74962   |
| C | -1.15764     | 0.0422740   | 2.35752   |
| H | -2.07238     | 0.105814    | 1.76327   |
| C | -1.19526     | 0.0420430   | 3.75532   |
| C | 1.20455      | -0.112050   | 3.74715   |
| H | -2.16032     | 0.0970300   | 4.26708   |
| C | 0.00743200   | -0.0296580  | 4.46915   |
| H | 2.17224      | -0.181352   | 4.25221   |
| H | 0.0116480    | -0.0230070  | 5.56378   |
